# Supplementary material
Source: PubMed Central journal article supplement (PMC4546533)
Supplement: NIHMS711922-supplement.pdf [file NIHMS711922-supplement.pdf]

## **Supplemental Information**

The structure and interactions of periplasmic domains of crucial MmpL membrane proteins from *Mycobacterium tuberculosis*.

Nicholas Chim, Rodrigo Torres, Yuqi Liu, Joe Capri, Gaëlle Batot, Julian Whitelegge & Celia W. Goulding

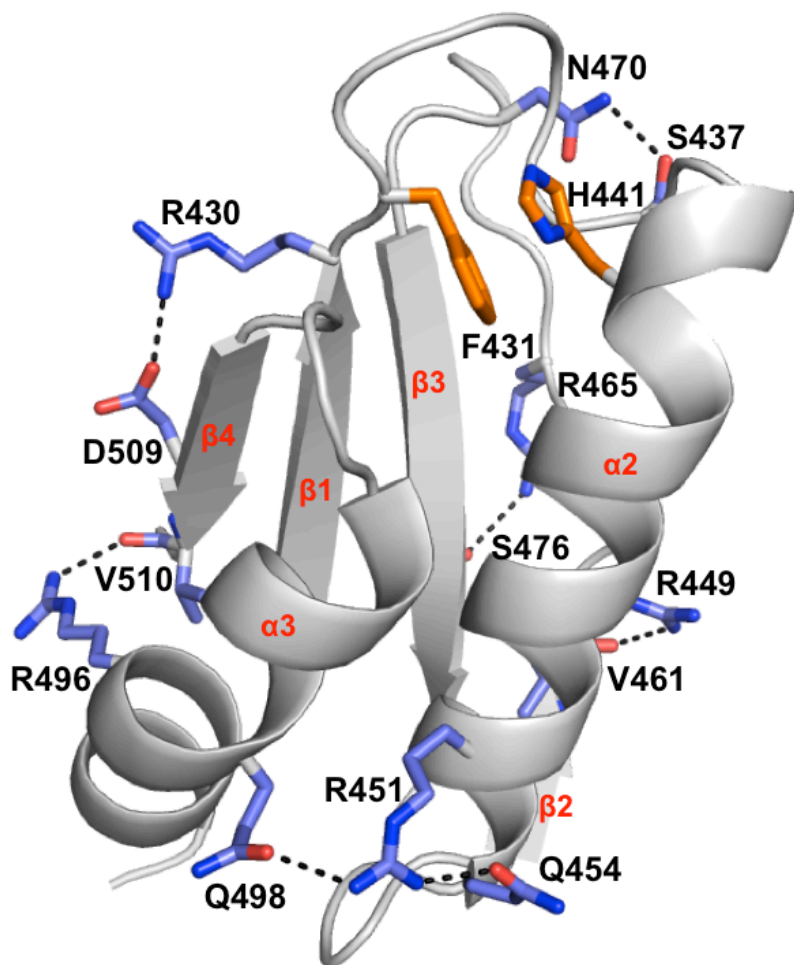

**Figure S1, related to Figure 2** Cartoon representation of MmpL11-D2 structure in grey. Residues involved in ion-pair interactions (dashed lines) and  $\pi$ - $\pi$  stacking are shown as sticks and colored lilac and orange, respectively. Oxygen and nitrogen atoms within the stick residues are colored red and blue, respectively.

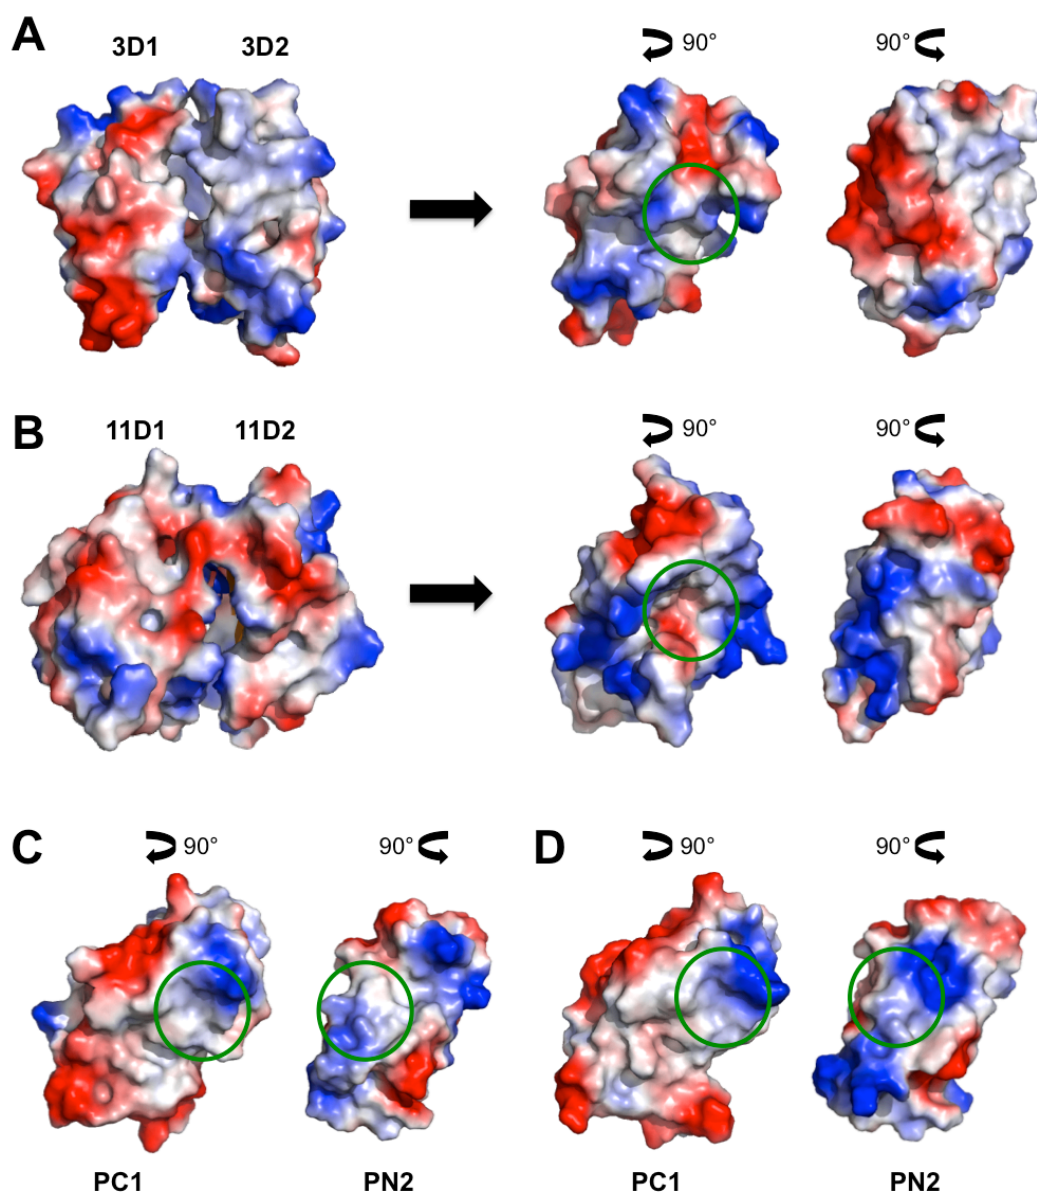

**Figure S2, related to Figure 5** Electrostatics potential maps of (A) MmpL3-D1-D2 and (B) MmpL11-D1-D2 heterodimer models where, on the right, each domain is rotated 90° to expose their binding interface. The orientations of both heterodimer models are identical to that of Figure 4A (top). Electrostatics potential maps of (C) AcrB (PDB code: 3W9H) and (D) MexB (PDB code: 2V50) PC1 and PN2 porter subdomains, where their binding interfaces are oriented similar to (A) and (B). Green circles in MmpL3/11 D1 domains signify potential binding sites that correspond to the binding sites of AcrB and MexB.



**Table S1, related to Figure 2. Structural homologs of MmpL11-D2 determined by DALI (Holm and Rosenstrom, 2010)**

| <b>Homolog</b> | <b>PDB identifier</b> | <b>Z-score</b> | <b>RMSD (Å)<sup>1</sup></b> | <b>Lali<sup>2</sup></b> | <b>nres<sup>3</sup></b> | <b>%id<sup>4</sup></b> |
|----------------|-----------------------|----------------|-----------------------------|-------------------------|-------------------------|------------------------|
| CusA           | 4DNT                  | 9.5            | 2.3                         | 80                      | 1031                    | 11                     |
| ArcB           | 3W9H                  | 8.8            | 2.4                         | 82                      | 1033                    | 15                     |
| CusA           | 3T56                  | 8.7            | 2.2                         | 80                      | 1027                    | 14                     |
| MexB           | 2V50                  | 8.6            | 2.6                         | 81                      | 1012                    | 15                     |
| ZneA           | 4K0E                  | 8.4            | 2.2                         | 80                      | 942                     | 16                     |
| MtrD           | 4MT1                  | 8.3            | 2.5                         | 81                      | 1023                    | 15                     |

<sup>1</sup>RMSD over  $\alpha$ C atoms

<sup>2</sup>Lali is the number of residues the search structure aligns to

<sup>3</sup>nres the number of residues in the protein

<sup>4</sup>%id is the sequence identity between aligned proteins.

**Table S2, related to Figure 4&5. Intermolecular crosslinked peptides between MmpL3 D1 and D2 domains**

| 3D1 – 3D2                                     | m/z      | z | Score | Score Diff |
|-----------------------------------------------|----------|---|-------|------------|
| AYAVGASK(504)*DPSVR – TVDDPAWSK(88)*K (2X)    | 868.7828 | 3 | 28.1  | 9.6        |
|                                               | 651.8394 | 4 | 28.7  | 12.7       |
| AYAVGASK(504)*DPSVR – ASQATGMATADK(125)*K     | 685.1018 | 4 | 28.4  | 15.2       |
| AYAVGASK(504)*DPSVR – G(N-term)*SHMLSLGK (2X) | 796.4180 | 3 | 26.7  | 7.6        |
|                                               | 597.5668 | 4 | 18.3  | 5.6        |
| G(N-term)*SHMLGGISEK – G(N-term)*SHMLSLGK     | 546.2835 | 4 | 24.8  | 15.6       |
| AYAVGASK(504)*DPSVR – K(89)*VVDELNR           | 608.3311 | 4 | 20.7  | 7.0        |

**Table S3, related to Experimental Procedures. List of MmpL3 and MmpL11 D1 and D2 domain constructs with corresponding primers. Restriction enzyme sequences are italicized.**

| Construct |                             |           | Primers                                                                                                                |
|-----------|-----------------------------|-----------|------------------------------------------------------------------------------------------------------------------------|
| Protein   | Domain                      | Boundary  |                                                                                                                        |
| MmpL3     | D1                          | 32 – 187  | For: 5' GCATATGCTGAGCCTCGGCAAGCACGTCACGCA 3'<br>Rev: 5' CGAAGCTTCTACAGCACTTCCATTGCGCGTTGGTCCG 3'                       |
|           | D1 $\Delta\alpha 4$         | 42 – 168  | For: 5' CGGGATCCGGCTTCTACGACGACGGCAGCCAATCGGTGCAAG 3'<br>Rev: 5' GCCTCGAGTCACGGTTGCAGCCCGGCGAGCTTCACC 3'               |
|           | D1 $\Delta\alpha 1\alpha 4$ | 67 – 168  | For: 5' CGGGATCCGGTACATCGTCGCGATCTTCCAAGCCCCAGC 3'<br>Rev: 5' GCCTCGAGTCACGGTTGCAGCCCGGCGAGCTTCACC 3'                  |
|           | D2                          | 419 – 560 | For: 5' GCATATGTTGGGCGGGATCAGCGAGAAGTACTTGCCGC 3'<br>Rev: 5' CGAAGCTTCTACTACGGCATCTTCGCGAACAGGCCGTG 3'                 |
|           | D2 $\Delta\alpha 4$         | 419 – 545 | For: 5' GCATATGTTGGGCGGGATCAGCGAGAAGTACTTGCCGC 3'<br>Rev: 5' GCCTCGAGTCAGGGAGTTCCACCGACCAAGACCGTGATTCCTTTGG 3'         |
|           | D2 $\Delta\alpha 1\alpha 4$ | 446 – 545 | For: 5' CGGGATCCGGATACCGCACCAATCCGCTGACACTGGTGATCCAG 3'<br>Rev: 5' GCCTCGAGTCAGGGAGTTCCACCGACCAAGACCGTGATTCCTTTGG 3'   |
| MmpL11    | D1                          | 41 – 187  | For: 5' CGGGATCCGGTTTTCGAAGTCGCCGGGTGCGAGTCATTGCTGGT 3'<br>Rev: 5' GCCTCGAGTCAAGGCAGGTTCCAGCGTTCGGCGTTGGCAATATCGTGT 3' |
|           | D1 $\Delta\alpha 4$         | 41 – 166  | For: 5' CGGGATCCGGTTTTCGAAGTCGCCGGGTGCGAGTCATTGCTGGT 3'<br>Rev: 5' GCCTCGAGTCACAGCGCGCCCTGCCCGATGACATAGAGC 3'          |
|           | D1 $\Delta\alpha 1\alpha 4$ | 64 – 166  | For: 5' CGGGATCCGGAGCCCCGGCGCTGGCGCTG 3'<br>Rev: 5' GCCTCGAGTCACAGCGCGCCCTGCCCGATGACATAGAGC 3'                         |
|           | D2                          | 390 – 529 | For: 5' GCATATGGTGCTGGGCAACAGCTTGCTGCGCCAGTTC 3'<br>Rev: 5' CGAAGCTTCTACTACGGTTGCGTCGCGGACACCCG 3'                     |
|           | D2 $\Delta\alpha 4$         | 390 – 514 | For: 5' GCATATGGTGCTGGGCAACAGCTTGCTGCGCCAGTTC 3'<br>Rev: 5' GCCTCGAGTCAGGTCGGCCCCGCGACGTCCACTTG 3'                     |
|           | D2 $\Delta\alpha 1\alpha 4$ | 423 – 514 | For: 5' CGGGATCCGGCCCCGTTTCAGGTGCTGGTCAGGTTTGACG 3'<br>Rev: 5' GCCTCGAGTCAGGTCGGCCCCGCGACGTCCACTTG 3'                  |

**References**

- Holm, L., and Rosenstrom, P. (2010). Dali server: conservation mapping in 3D. *Nucleic Acids Res* 38, W545-549.
- Krogh, A., Larsson, B., von Heijne, G., and Sonnhammer, E.L. (2001). Predicting transmembrane protein topology with a hidden Markov model: application to complete genomes. *Journal of molecular biology* 305, 567-580.
